# Supplementary material
Source: Springer Nature journal article supplement (https://www.springermedizin.de/resource/supplementary/13054_2004_3487_MOESM7_ESM.pdf/9720592)

### Remifentanyl

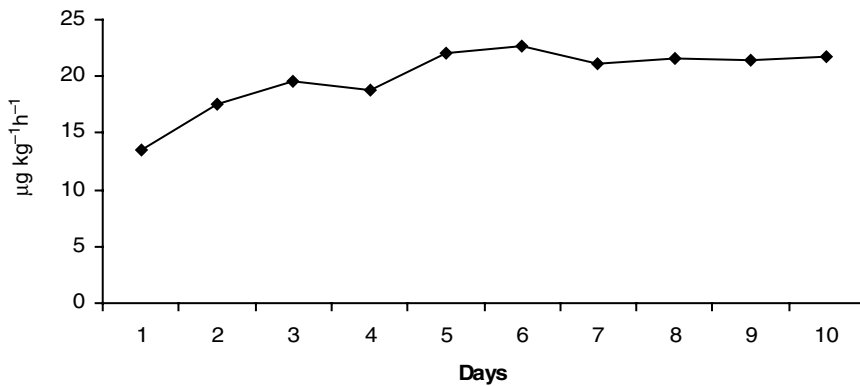

### Fentanyl

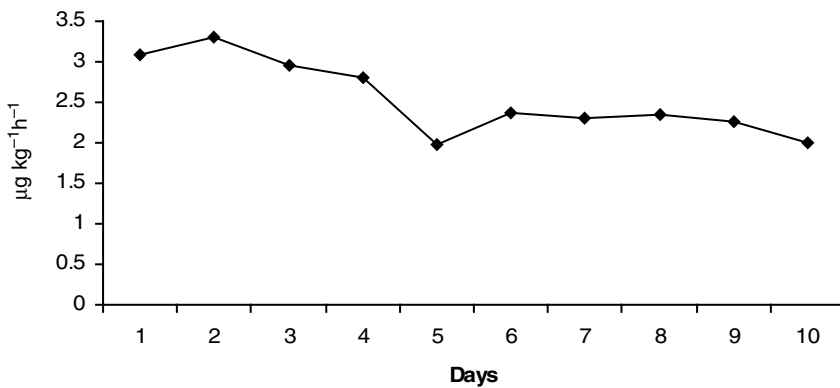

### Morphine

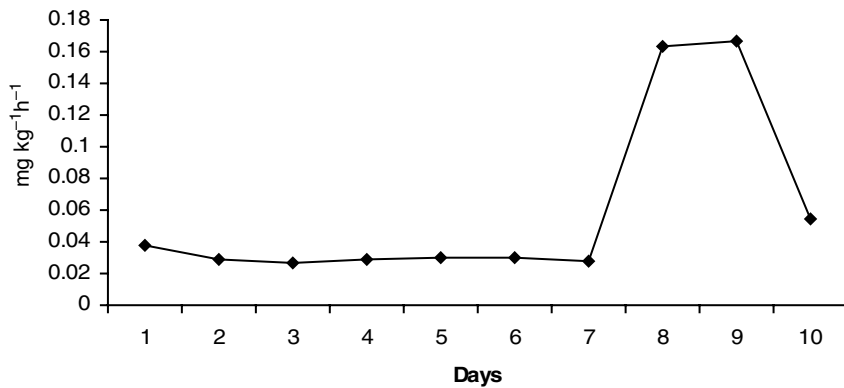

Supplement: MOESM7 [file 9720592]
